# Supplementary material for: Application of regional meteorology and air quality models based on MIPS CPU Platform
Source: Copernicus journal article supplement (doi:10.5194/egusphere-2023-2962), 2024-01-02
Supplement: Supplementary file 1 [file egusphere-2023-2962-supplement.pdf]

## Supplement

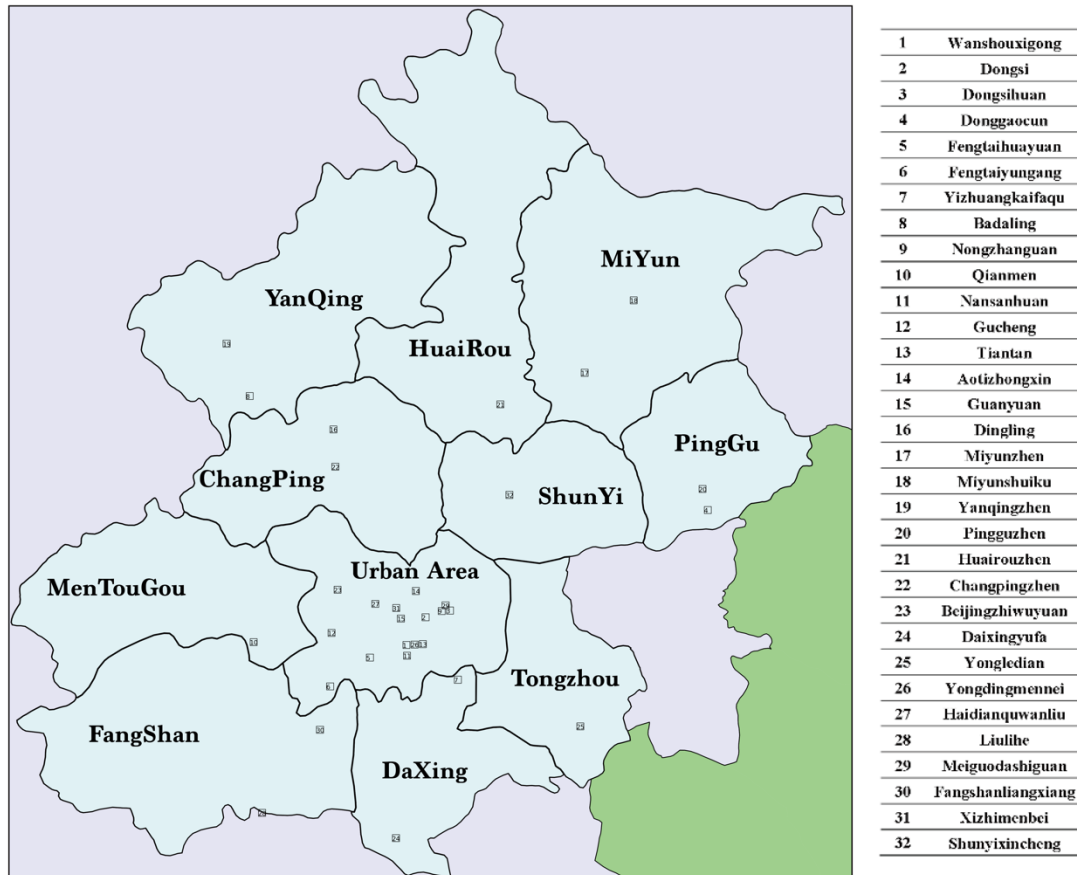

**Figure S1.** The positions of the 32 observation stations in Beijing are marked with numerical labels in the figure, covering both the urban area and the surrounding regions.
